# Supplementary material for: Conditional Mutation of Hand1 in the Mouse Placenta Disrupts Placental Vascular Development Resulting in Fetal Loss in Both Early and Late Pregnancy
Source: MDPI journal article supplement (doi:10.3390/ijms22179532), 2021-09-02
Supplement: s1 [file s1]

## Supplementary Material

**Table S1** Genotyping primer sequences, qPCR primer sequences and immunohistochemistry/immunofluorescent antibodies

| <b>Genotyping Primers</b>                   | <b>Forward</b>                 | <b>Reverse</b>                 |
|---------------------------------------------|--------------------------------|--------------------------------|
| Hand1 275-448                               | 5'-GCCCAAACGAAAAGGCTCAG-3'     | 5'-AGCACGTCCATCAAGTAGGC-3'     |
| Sry                                         | 5'-AACAACTGGGCTTTGCACATTG-3'   | 5'-GTTTATCAGGGTTTCTCTCTAGC-3'  |
| Nifa                                        | 5'-TGCTGTGTTCTGGTCAGTCAAG-3'   | 5'-CAAAGCAAATCTCCATGCTCGG-3'   |
|                                             |                                |                                |
| <b>qPCR Primers</b>                         | <b>Forward</b>                 | <b>Reverse</b>                 |
| Angiopoietin 1                              | 5'-GCACGAAGGATGCTGATAAC-3'     | 5'-AACCACCAACCTCCTGTTAG-3'     |
| Angiopoietin 2                              | 5'-GCACAAAGGATTCTGGACAAT-3'    | 5'-AAGGACCACATGCGTCAAA-3'      |
| Vascular endothelial growth factor $\alpha$ | 5'-TTAAACGAACGTACTTGACAGATG-3' | 5'-AGAGGTCTGGTTCCCGAA-3'       |
| Placenta growth factor                      | 5'-GACCTATTCTGGAGACGACA-3'     | 5'-GGTTCCTCAGTCTGTGAGTT-3'     |
| Angiopoietin 1 Receptor (Tie2)              | 5'-GATTTTGGATTGTCACGAGGTCA-3'  | 5'-CACCAATATCTGGGCAAATGATGG-3' |
|                                             |                                |                                |
| <b>Antibodies for IHC and IF</b>            | <b>Source</b>                  | <b>Concentration</b>           |
| Hand1 goat                                  | R&D Systems AF3168             | 1:100                          |
| CD-31 (IF) goat                             | R&D Systems AF3628             | 1:100                          |
| CD-31 (IHC) rabbit                          | Abcam ab28364                  | 1:100                          |
| Cytokeratin 7 rabbit                        | Abcam ab199718                 | 1:800                          |
| Biotinylated anti-Goat                      | Vector BA-5000                 | 1:200                          |
| Biotinylated anti-Rabbit                    | Vector BA-1000                 | 1:200                          |
| Alexa Fluor 488 anti-Goat                   | Invitrogen A11078              | 1:200                          |
| Alexa Fluor 647 anti-Rabbit                 | Invitrogen A32795              | 1:200                          |
| Alexa Fluor 555 anti-Goat                   | Invitrogen A27017              | 1:200                          |
